# Supplementary material for: IL-functionalized Mn(ii)-doped core–shell Fe3O4@Zr-MOF nanomaterials for the removal of MB from wastewater based on dual adsorption/Fenton catalysis
Source: Royal Society of Chemistry journal article supplement (doi:10.1039/d2nj00651k), 2022-01-01
Supplement: d2nj00651k2.pdf [file d2nj00651k2.pdf]

## Supporting Information

### IL-functionalized Mn(II) -doped core-shell Fe<sub>3</sub>O<sub>4</sub>@ Zr-MOF nanomaterials for removal MB from wastewater based on dual adsorption/Fenton catalysis

Ruowei Lu,<sup>a</sup> Cuijuan Wang,<sup>a</sup> \*Yanxia Chen,<sup>a</sup> Lichuan Tan,<sup>a</sup> Peng Wang,<sup>a</sup> and  
Siwen Feng<sup>a</sup>

<sup>a</sup> Department of Chemistry and Chemical Engineering, School of Life Science and  
Engineering, Southwest Jiaotong University, Chengdu, Sichuan, 610031, PR China

\*Corresponding Author

#### Figures and tables

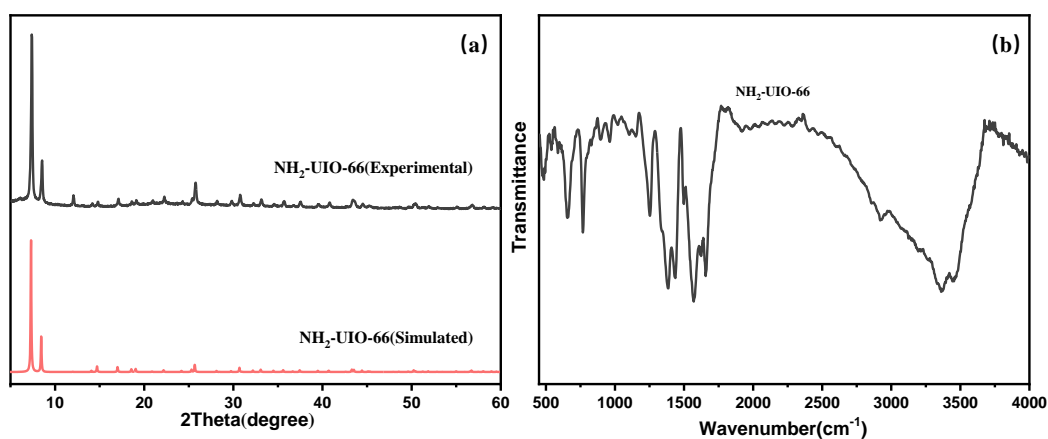

Figure. S1. (a) PXRD patterns and (b) FT-IR spectra of NH<sub>2</sub>-Uio-66.

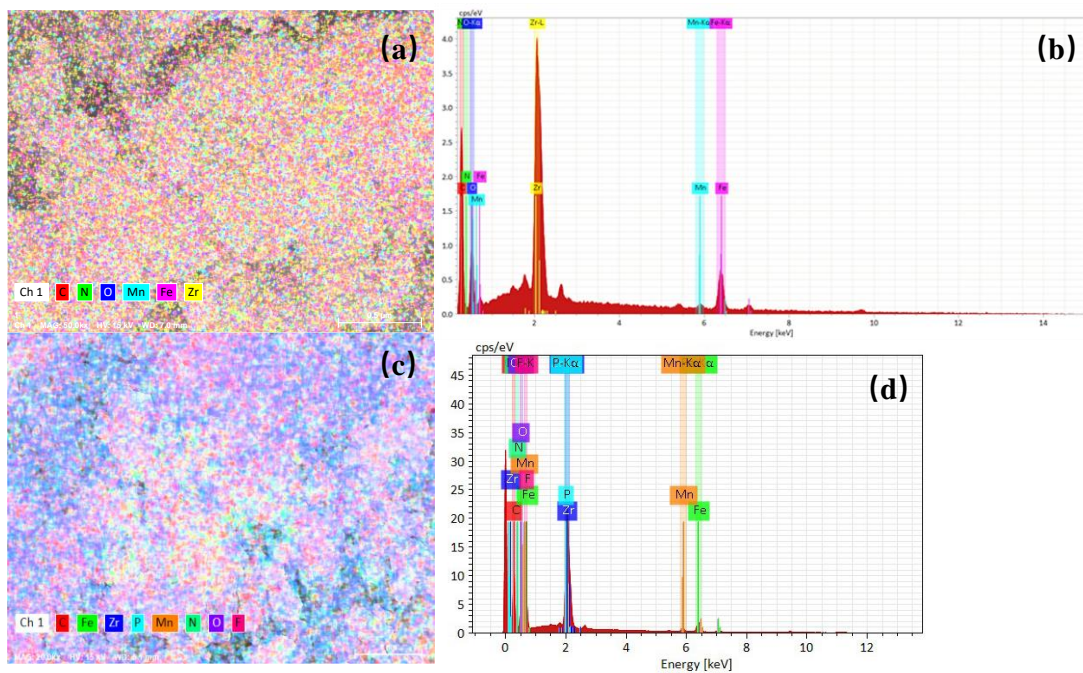

Figure. S2. EDS spectrum of the obtained MFC@Mn-NH<sub>2</sub>-UiO-66 and MFC@Mn-NH<sub>2</sub>-UiO-66@IL magnetic composites.

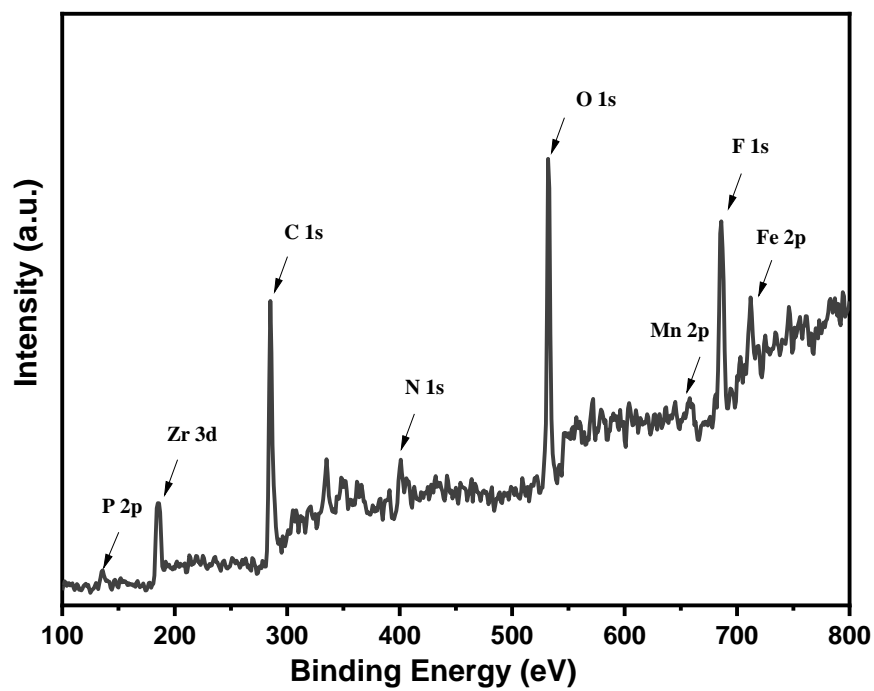

Figure. S3. XPS spectra of MFC@Mn-NH<sub>2</sub>-UiO-66@IL.

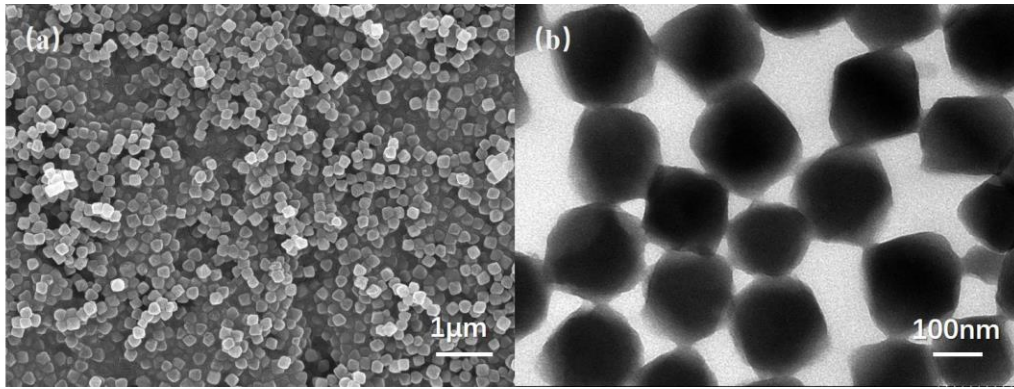

Figure. S4. (a) SEM and (b) TEM images of NH<sub>2</sub>-UiO-66.

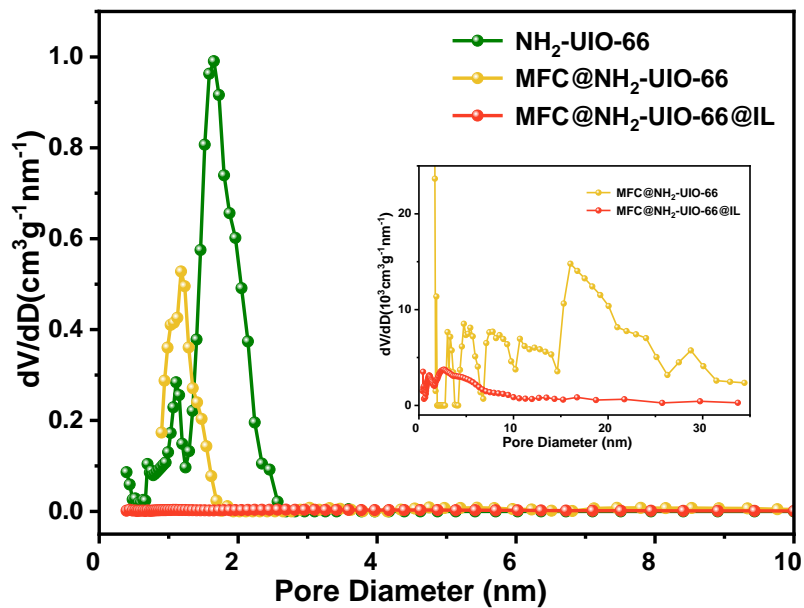

Figure. S5. The pore size distribution of NH<sub>2</sub>-UiO-66, MFC@Mn-NH<sub>2</sub>-UiO-66 and MFC@Mn-NH<sub>2</sub>-UiO-66@IL nanocomposites.

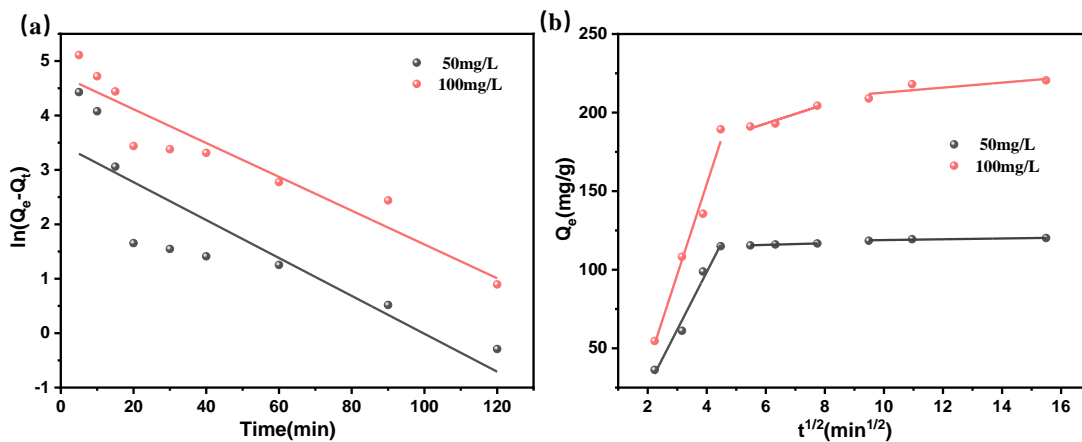

Figure. S6. (a) Kinetics plot of the pseudo first-order, and (b) intra-particle diffusion kinetic model for MB adsorption.

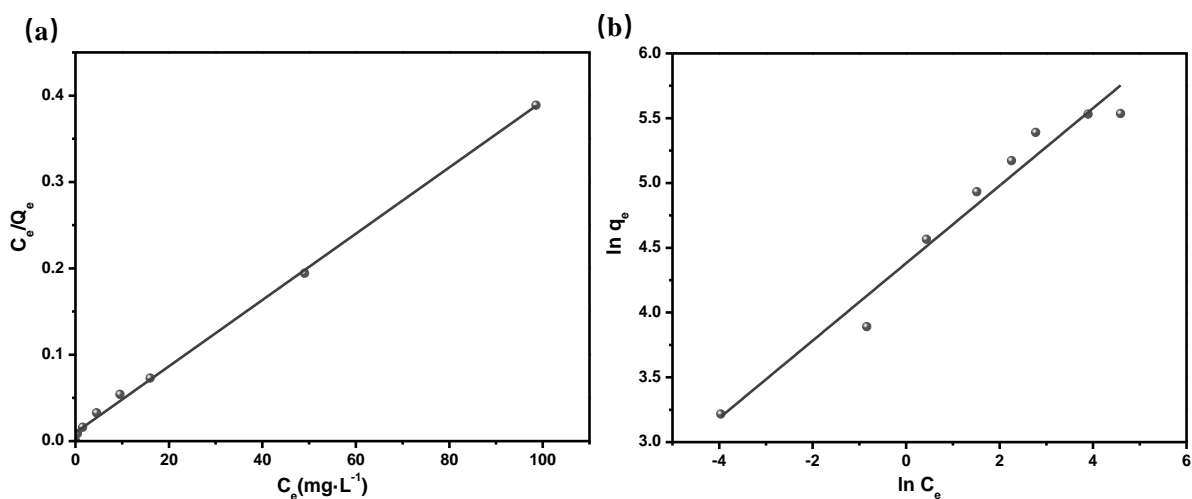

Figure. S7. Adsorption isotherm of (a) Langmuir, and (b) Freundlich model for MB removal by MFC@Mn-NH<sub>2</sub>-UiO-66@IL.

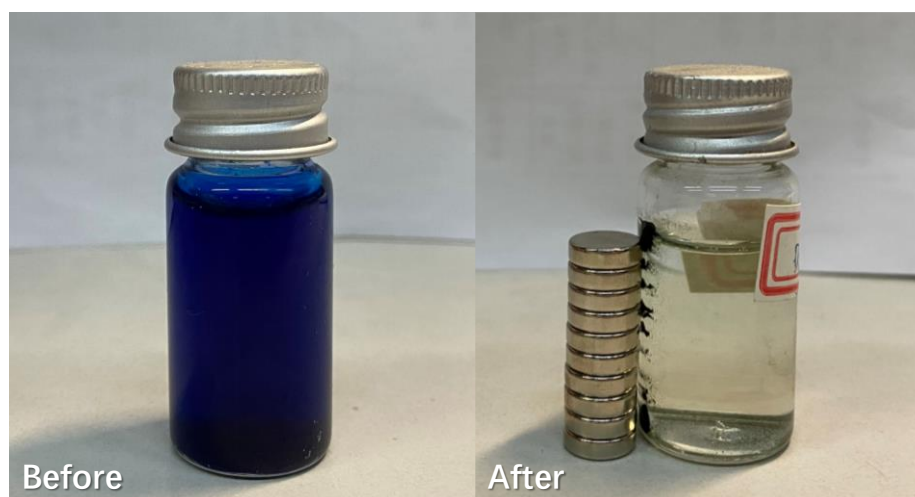

Figure. S8. Before and after comparison of adsorption/catalytic MB.

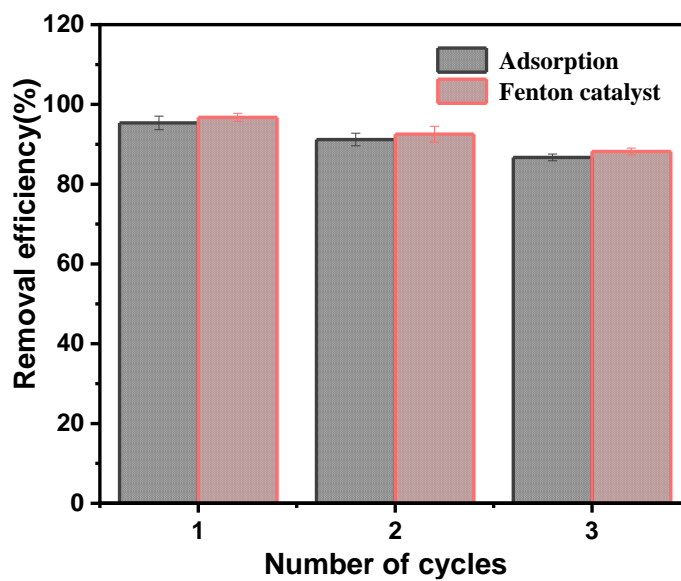

Figure. S9. Recycle efficiency of MFC@Mn-NH<sub>2</sub>-UiO-66@IL over three cycles.

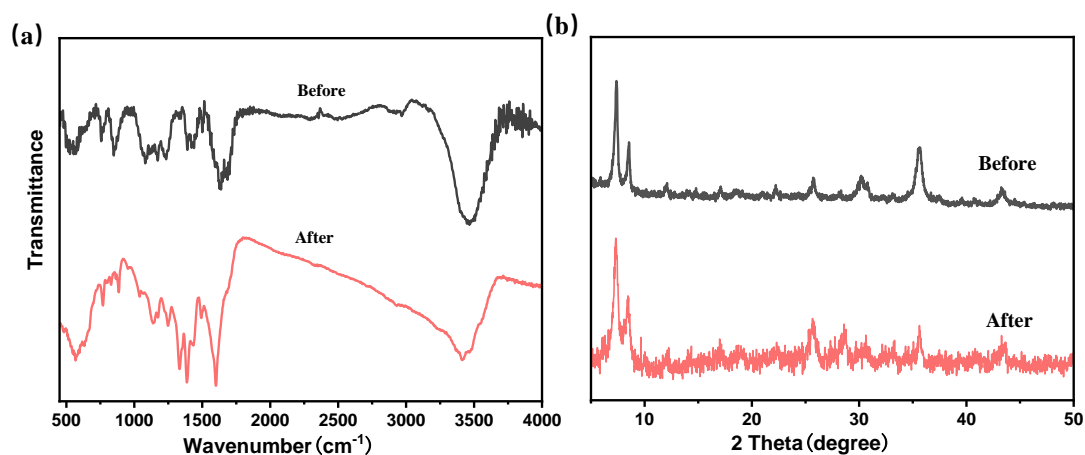

Figure. S10. (a)FT-IR spectra and (b)PXRD patterns MFC@Mn-NH<sub>2</sub>-UiO-66@IL composite before and after adsorption of MB.

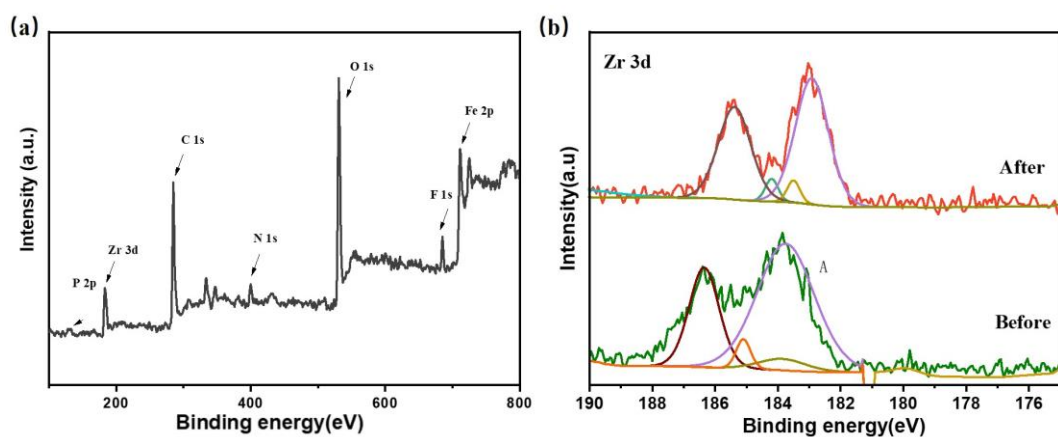

Figure. S11. XPS spectra of the recycled MFC@Mn-NH<sub>2</sub>-UiO-66@IL: (a) The survey spectrum; (b) XPS Zr 3d spectrum.

Table. S1. Element components of MFC@Mn-NH<sub>2</sub>-UiO-66, and MFC@Mn-NH<sub>2</sub>-UiO-66@IL.

| Samples                           | C<br>(wt%) | Zr<br>(wt%) | O<br>(wt%) | F<br>(wt%) | Fe<br>(wt%) | N<br>(wt%) | P<br>(wt%) | Mn<br>(wt%) |
|-----------------------------------|------------|-------------|------------|------------|-------------|------------|------------|-------------|
| MFC@Mn-NH <sub>2</sub> -UiO-66    | 41.51      | 24.46       | 15.95      | -          | 11.4        | 4.07       | -          | 1.05        |
| IL@MFC@Mn-NH <sub>2</sub> -UiO-66 | 31.21      | 23.28       | 21.62      | 7.68       | 6.41        | 7.44       | 1.53       | 0.66        |

Table. S2. BET surface areas and t-plot micropore volumes of samples.

| Samples                           | $S_{\text{BET}}(\text{m}^2 \cdot \text{g}^{-1})$ | $V_{\text{pore}}(\text{cm}^3 \cdot \text{g}^{-1})$ |
|-----------------------------------|--------------------------------------------------|----------------------------------------------------|
| NH <sub>2</sub> -UiO-66           | 1264.30                                          | 0.54                                               |
| MFC@Mn-NH <sub>2</sub> -UiO-66    | 699.25                                           | 0.46                                               |
| MFC@Mn-NH <sub>2</sub> -UiO-66@IL | 30.31                                            | 0.06                                               |

Table. S3. Intra-particle diffusion model parameters for the adsorption of MB dye onto MFC@Mn-NH<sub>2</sub>-UiO-66@IL composite

| $C_0(\text{mg} \cdot \text{L}^{-1})$ | First step                                                          |                                              |       | Second step                                                         |                                              |       | Third step                                                          |                                              |       |
|--------------------------------------|---------------------------------------------------------------------|----------------------------------------------|-------|---------------------------------------------------------------------|----------------------------------------------|-------|---------------------------------------------------------------------|----------------------------------------------|-------|
|                                      | $K_{\text{id},1}$<br>( $\text{mg g}^{-1} \cdot \text{min}^{-0.5}$ ) | $C_1$<br>( $\text{mg} \cdot \text{L}^{-1}$ ) | $R^2$ | $K_{\text{id},2}$<br>( $\text{mg g}^{-1} \cdot \text{min}^{-0.5}$ ) | $C_2$<br>( $\text{mg} \cdot \text{L}^{-1}$ ) | $R^2$ | $K_{\text{id},2}$<br>( $\text{mg g}^{-1} \cdot \text{min}^{-0.5}$ ) | $C_3$<br>( $\text{mg} \cdot \text{L}^{-1}$ ) | $R^2$ |
| 50 $\text{mg} \cdot \text{L}^{-1}$   | 57.69                                                               | -76.25                                       | 0.98  | 6.09                                                                | 196.86                                       | 0.67  | 1.58                                                                | 156.48                                       | 0.94  |
| 100 $\text{mg} \cdot \text{L}^{-1}$  | 36.72                                                               | -48.33                                       | 0.98  | 0.51                                                                | 116.35                                       | 0.88  | 0.25                                                                | 112.72                                       | 0.98  |

Table. S4.  $R_L$  values for the adsorption of MB dye.

| $C_0(\text{mg} \cdot \text{L}^{-1})$ | 10   | 20   | 40   | 60   | 80   | 100   | 150   | 200   |
|--------------------------------------|------|------|------|------|------|-------|-------|-------|
| $R_L$                                | 0.20 | 0.11 | 0.06 | 0.04 | 0.03 | 0.025 | 0.016 | 0.012 |
